# Supplementary material for: The grey mould Botrytis cinerea employs multiple mechanisms to protect itself from antifungal plant metabolites
Source: Research Square preprint supplement (doi:10.21203/rs.3.rs-3241541/v1), 2023-08-15
Supplement: Supplementary file 1 [file 7f575bc6095c3dbdd7fe0f64.xlsx]

## Sheet: Sheet1
Gene name	Protein name	Function	Type	Var start	Var stop	extra information
Bcin01g01210	t-SNARE coiled-coil homology domain-containing protein	Unknown	indel	487398	493111	½ missing
Bcin01g01220	NACHT domain-containing protein	Protein inferred from homology (homologs are lipases from ROG1 family)	indel	487398	493111	¾ missing
Bcin01g01360	Uncharacterized protein	Unknown	indel	540801	544305	missing
Bcin01g01370	MFS domain-containing protein	Transmembrane transporter activity	indel	540801	544305	¾ missing
Bcin01g03370	Uncharacterized protein	Unknown	rearrangement	1201062	1201750	1/2 on contig 3, ½ on contig 10
Bcin01g03530	Uncharacterized protein	Unknown	indel?	1263957	1273894	Missing in alignment, reads do map
Bcin01g03540	Uncharacterized protein	Unknown	indel?	1263957	1273894	Missing in alignment, read mapping highly variable
Bcin01g03890	Uncharacterized protein	Unknown	indel	1401694	1445095	missing
Bcin01g03900	Uncharacterized protein	Unknown	indel	1401694	1445095	missing
Bcin01g03910	Uncharacterized protein	Unknown	indel	1401694	1445095	missing
Bcin01g05060	Aminopeptidase	Protein inferred from homology (homologs are peptidases in M1 family)	rearrangement	1809460	1873469	Entirely moved to contig 6
Bcin01g05270	Bcrrn3	Protein inferred from homology (homologs are RNA polymerases in the RRN3 family)	rearrangement	1809460	1873469	largely on contig 10, tiny part on contig 6
Bcin01g07660	ABC transmembrane type-1 domain-containing protein	Predicted ABC transporter protein	indel	2682805	2682811	predicted by freebayes, not clearly in map. Frameshift mutation
Bcin01g10820	ANK_REP_REGION domain-containing protein	Predicted protein with ANK repeats (protein-protein interaction domains)	indel	3768549	3771548	½ missing
Bcin02g00012	Uncharacterized protein	Unknown	indel	40222	41929	¾ missing, only in NUCmer
Bcin02g00380	Uncharacterized protein	Unknown	indel	237215	238247	½ missing
Bcin02g00390	Zn(2)-C6 fungal-type domain-containing protein	Predicted transcription factor activity	indel	237215	238247	½ missing
Bcin02g01470	ANK_REP_REGION domain-containing protein	Predicted protein with ANK repeats (protein-protein interaction domains)	indel	584785	593203	missing, illumina/nanopore very variable mapping. SNPs marked inside variable region
Bcin02g01480	HET domain-containing protein	Predicted Heterokaryon incompatibility protein	indel	584785	593203	½ missing, illumina/nanopore very variable mapping
Bcin02g07200	Uncharacterized protein	Unknown	indel	2545362	2546527	1/8 missing, last chunk
Bcin02g07270	WD_REPEATS_REGION domain-containing protein	Unknown, possibly involved in G-protein signalling	indel	2573692	2578467	¾ missing, indels visible in freebayes
Bcin02g07280	Uncharacterized protein	possible transmembrane domain	indel	2573692	2578467	missing, indels visible in freebayes
Bcin02g07750	Uncharacterized protein	Unknown	indel	2759073	2777449	missing
Bcin03g00430	Bclhs1	ATP-binding? Contains coiled-coil domain	duplication	136513	147087
Bcin03g00440	Uncharacterized protein	Possible monooxygenase, involved in virulence	duplication	136513	147087
Bcin04g00020	Uncharacterized protein	Unknown	indel	16160	17667	Strange highly variable/repeat region in CDS
Bcin04g00660	Uncharacterized protein	Unknown	indel, SNP	251393	253559	¼ missing, also one major SNP
Bcin04g00790	WD_REPEATS_REGION domain-containing protein	Unknown, possibly involved in G-protein signalling	rearrangement, SNPs	272963	302665	Extreme sequence variation on specifically this gene
Bcin04g00800	ANK_REP_REGION domain-containing protein	Predicted protein with ANK repeats (protein-protein interaction domains)	rearrangement, indel	272963	302665	Indel at end of rearrangment, 792nt missing in nanopore
Bcin04g00900	Uncharacterized protein	Involved in “nucleoside metabolic process”	rearrangement, SNPs	329740	344049	Variable/missing parts in mapping, but tagged “translocation” in NUCmer
Bcin04g00930	ANK_REP_REGION domain-containing protein	Predicted protein with ANK repeats (protein-protein interaction domains)	indel	348374	353915	variable mapping, chunks missing
Bcin04g00940	TPR_REGION domain-containing protein	Unknown, contains TPR region, a protein-protein interaction domain	indel	357125	364005	variable mapping, at last ½ of seq.
Bcin04g00950	Uncharacterized protein	Contains ANK (protein-protein interaction) and NACHT (NTPase) domains	indel/SNPs	357125	364005	“missing” in NUCmer, but only partly missing in read map
Bcin04g00990	FAD_binding_3 domain-containing protein	Flavoenzyme	rearrangement/SNPs	391585	396103	Jump from contig 5 to contig 19, multiple major SNPs
Bcin04g01020	Uncharacterized protein	Contains WD (involved in G-protein signalling) and NACHT (NTPase) domains	rearrangement	401517	403760	“translocation”, paired with a highly repeated region and several SNPs
Bcin04g01090	ANK_REP_REGION domain-containing protein	Possibly transports metal ions over the membrane	indel/SNPs	433806	440392	only partly missing in read map
Bcin04g01970	Uncharacterized protein	Unknown	indel/SNPs	775773	778209	Missing in alignment, read mapping highly variable
Bcin04g01980	HET domain-containing protein	Predicted Heterokaryon incompatibility protein	indel/SNPs	775773	778209	Missing in alignment, read mapping highly variable
Bcin05g04560	ANK_REP_REGION domain-containing protein	Predicted protein with ANK repeats (protein-protein interaction domains)	indel	1619455	1620967	½ missing
Bcin05g05300	Uncharacterized protein	transmembrane protein	indel	1875493	1879721	missing
Bcin05g07730	Uncharacterized protein	Unknown	indel	2725687	2735773	missing
Bcin05g07740	Uncharacterized protein	Unknown	indel	2725687	2735773	missing
Bcin05g07750	Uncharacterized protein	transmembrane protein	indel	2725687	2735773	missing
Bcin05g07760	Uncharacterized protein	Unknown	indel	2725687	2735773	missing
Bcin05g07770	BTB domain-containing protein	BTB-domains is a homodimerization domain, associated with Zn-finger transcription factors	indel	2725687	2735773	missing
Bcin05g07790	BTB domain-containing protein	BTB-domains is a homodimerization domain, associated with Zn-finger transcription factors	indel/rearrangement	2742216	2745497	appears missing, but tagged “translocation”
Bcin05g07800	Uncharacterized protein	Unknown	indel/rearrangement	2742216	2745497	appears missing, but tagged “translocation”
Bcin05g08400	Bcpks21	Acyltransferase/Methyltransferase	indel	2923293	2924337	appears missing in NUCmer, not in readmap
Bcin05g08410	Uncharacterized protein	Unknown	duplication	2949464	2949921	very not unique in shustring
Bcin05g08420	Uncharacterized protein	Unknown	duplication	2949464	2949921	very not unique in shustring
Bcin06g00010	Uncharacterized protein	Unknown	indel	1	11801	Near telomere…
Bcin06g00020	Uncharacterized protein	Unknown	indel	1	11801	Near telomere…
Bcin06g00050	Uncharacterized protein	Contains NAGLU domain (Alpha-N-acetylglucosaminidase), glycoside hydrolase	rearrangement	33232	61144	¾ on contig 49, ¼ on contig 1
Bcin06g01480	Uncharacterized protein	Unknown	inversion	526926	528910	NUCmer calls this an inversion, no reads map
Bcin06g01670	Uncharacterized protein	Unknown	SNP	596811	596811	SNP changes stop codon to Tyrosine
Bcin06g07590	Uncharacterized protein	Unknown	indel	2672645	2725906	Near telomere…
Bcin06g07600	Uncharacterized protein	Unknown	indel	2672645	2725906	Near telomere…
Bcin06g07610	Uncharacterized protein	phosphorylation, phosphorelay signal transduction	indel	2672645	2725906	Near telomere…
Bcin07g00010	FAD_binding_3 domain-containing protein	Flavoenzyme	indel	10596	16813	missing
Bcin07g00780	Uncharacterized protein	Unknown	indel	287408	293445	missing
Bcin07g00790	Uncharacterized protein	Unknown	indel	287408	293445	missing
Bcin07g01500	PI-PLC Y-box domain-containing protein	Contains PI-PLC Y-box (signal transduction)	indel	550080	551364	½ missing
Bcin07g01780	Zn(2)-C6 fungal-type domain-containing protein	Predicted transcription factor activity	indel	657477	683326	missing
EFBcG00000013138	tRNA	tRNA for anticodon CGG	indel	657477	683326	missing, ncRNA
Bcin07g04990	Uncharacterized protein	Oxidoreductase	rearrangement/indel	1798908	1802978	NUCmer reports gene on other chromosome. No reads map (maybe due to paired reads not mapping)
Bcin07g05640	Bcmfs1	Transmembrane transporter activity	indel	2087481	2087484	small indel in first exon
Bcin07g05730	Uncharacterized protein	transmembrane protein	indel	2119929	2123434	Missing in alignment, read mapping highly variable
Bcin07g05940	Uncharacterized protein	Unknown	indel	2194857	2202520	Only missing in alignment
Bcin07g05950	Uncharacterized protein	transmembrane protein	indel	2194857	2202520	Only missing in alignment
Bcin07g06900	Uncharacterized protein	Unknown	indel	2544380	2545106	First 1/8 missing
Bcin07g06920	Uncharacterized protein	Unknown	rearrangement	2556100	2566414	First ¾ on contig 40, rest contig 21
Bcin07g06930	Uncharacterized protein	Unknown	rearrangement/indel	2556100	2566414	On other contig, and one SNP
Bcin08g00060	GH43	tomatinase	indel	20182	32824	missing
Bcin08g00070	GT28	Carbohydrate metabolism / lipid glycosilation	indel	20182	32824	missing
Bcin08g01050	HET domain-containing protein	Predicted Heterokaryon incompatibility protein	indel	424708	430824	Missing in alignment, read mapping highly variable
Bcin08g01060	FAD-binding PCMH-type domain-containing protein	Flavoenzyme	indel	424708	430824	Missing in alignment, read mapping highly variable
Bcin08g02180	Uncharacterized protein	Unknown	indel	834869	839237	Only missing in alignment
Bcin08g06810	Uncharacterized protein	Unknown	SNP	2504740	2504740	Possible inserted stop codon
Bcin08g07100	Uncharacterized protein	transmembrane protein	indel	2595085	2617329	Near telomere…
Bcin08g07110	NACHT domain-containing protein	also contains coiled-coil and “NTPase” domains	indel	2595085	2617329	Near telomere…
Bcin08g07120	Uncharacterized protein	Iron ion binding + oxidoreductase activity	indel	2595085	2617329	Near telomere…
Bcin08g07140	Lactamase_B domain-containing protein	Contains domain associated with beta-lactamases and other proteins (enzymes, associated with breakdown of antibiotics in bacteria)	indel	2595085	2617329	Near telomere…
Bcin09g00580	2-dehydropantoate 2-reductase	Catalyzes the NADPH-dependent reduction of ketopantoate into pantoic acid	indel	213896	213903	Frameshift & lost stop codon. (Read mapping shifts indel to the left)
Bcin09g00610	Uncharacterized protein	Unknown	indel	225081	225874	Missing transcription start?
Bcin09g00670	Uncharacterized protein	Unknown	indel/SNPs	245595	248706	Either missing, or two major SNPs
Bcin09g00680	Uncharacterized protein	Unknown	indel	245595	248706	Missing in alignment, read mapping highly variable
Bcin09g00820	Bcgst6	Glutathione metabolic process (glutathione is an anti-oxidant)	indel	297383	299399	Missing in alignment, read mapping highly variable
Bcin09g01110	Glucanase	Hydrolyzes O-glycosyl compounds, including cellulose	rearrangement	403698	420489	on other contig
Bcin09g01120	C2H2-type domain-containing protein	Contains zinc finger domain C2H2 (potential transcription factor)	rearrangement/indel/SNPs?	403698	420489	Multiple SNPs/small indels reported by freebayes. Poor read mapping, chunks missing…
Bcin09g01130	Uncharacterized protein	Unknown	indel/SNPs	403698	420489	Chunks missing in mapping, possible stop codon insert
Bcin09g01870	Uncharacterized protein	Metal ion binding, Ubiquitin transferase activity (Ubi conjugation pathway)	indel	690481	693732	missing
Bcin09g01880	Uncharacterized protein	Contains coiled coil	indel	690481	693732	missing
Bcin09g03120	Uncharacterized protein	Unknown	indel/snps	1114305	1114819	multiple SNPs, samll indel, stop gained + frameshift mutation
Bcin09g05710	MFS domain-containing protein	Transmembrane transporter activity	indel	1997045	2011863	missing
Bcin09g05720	Uncharacterized protein	Unknown	indel	1997045	2011863	missing
Bcin09g06720	Uncharacterized protein	Unknown	indel	2372716	2374931	small indel, and large chunk missing in alignment
Bcin09g06810	Uncharacterized protein	Unknown	snp	2401601	2401601	possible loss of exon start?
Bcin10g00020	MFS domain-containing protein	Transmembrane transporter activity	rearrangement	102	6825	On different contig, no reads map
Bcin10g00040	Bcpks7	Methyltransferase/ligase (multifunctional enzyme) Involved in fatty acid biosynthesis (maybe membrane composition is affected?)	snps	10212	19070	Tons of SNPs, at least 12 with major effect
Bcin10g00910	Methyltransf_2 domain-containing protein	Methylation, but “Lacks conserved residue(s) required for the propagation of feature annotation.”	indel/snp	376780	376996	start missing, stop inserted
Bcin10g01850	Uncharacterized protein	Unknown	indel/snps	706330	735168	possibly promoter missing, 2 stops gained
Bcin10g04480	Uncharacterized protein	Unknown	indel/snp	1718999	1722519	Missing in alignment, read mapping highly variable, frameshift mutation before indel
Bcin10g05850	Uncharacterized protein	Unknown	indel	2231594	2254698	Only missing in alignment
Bcin10g06160	Uncharacterized protein	Contains coiled coil	indel	2367411	2372655	missing
Bcin10g06170	Uncharacterized protein	Unknown	indel	2367411	2372655	missing
Bcin10g06180	Uncharacterized protein	Contains coiled coil	indel	2367411	2372655	start and stop missing, extra stop gained
Bcin10g06190	Uncharacterized protein	Unknown	indel/snp	2373547	2377148	Missing in alignment, read mapping highly variable, stop gained
Bcin10g06200	Uncharacterized protein	Contains 4 coiled coils	indel/snps	2373547	2377148	start and stop missing, 4 major snps
Bcin10g06210	Uncharacterized protein	Unknown	indel	2379374	2385794	missing
Bcin10g06220	Uncharacterized protein	Unknown	indel	2379374	2385794	missing
Bcin10g06230	NADAR domain-containing protein	unknown (NADAR is domain of unknown function)	indel	2379374	2385794	end missing
Bcin10g06250	Uncharacterized protein	Unknown	duplication	2406611	2419276	marked duplication at end of chromosome, marked clearly not unique in shustring
Bcin10g06260	Uncharacterized protein	Unknown	duplication	2406611	2419276	marked duplication at end of chromosome, marked clearly not unique in shustring
Bcin10g06270	Uncharacterized protein	Unknown	duplication	2406611	2419276	marked duplication at end of chromosome…
Bcin11g00010	Uncharacterized protein	Hydrolyzes O-glycosyl compounds, including cellulose	rearrangement	8374	12406	On different contig, no reads map
Bcin11g01680	Uncharacterized protein	transmembrane protein	indel	542550	542567	Indel in freebayes, highly variable read maping
Bcin11g02450	ANK_REP_REGION domain-containing protein	Predicted protein with ANK repeats (protein-protein interaction domains)	indel	831058	837401	missing
Bcin11g03350	Uncharacterized protein	Unknown	indel	1152450	1152458	indel, possible frameshift mutation
Bcin11g05410	Uncharacterized protein	Unknown	indel	1919619	1924604	missing
Bcin11g06530	Uncharacterized protein	Unknown	indel	2320939 2328913		missing
Bcin12g00010	Uncharacterized protein	Involved in pathogenesis (mono-oxygenase, virulence)	indel	4518	7459	missing
Bcin12g00130	Uncharacterized protein	Unknown	indel	61386	66058	missing
Bcin12g00140	CN hydrolase domain-containing protein	Nitrogen compound metabolic process, glutamine/asparagine amidohydrolase activity	indel	61386	66058	missing, same locus as gene before
Bcin12g00480	MFS domain-containing protein	Transmembrane transporter activity	snp	176688	176688	stop gained, but near end of AA sequence
Bcin12g00980	ANK_REP_REGION domain-containing protein	Predicted protein with ANK repeats (protein-protein interaction domains)	indel	338619	347801	missing
Bcin12g00990	ANK_REP_REGION domain-containing protein	Predicted protein with ANK repeats (protein-protein interaction domains)	indel	338619	347801	missing
Bcin12g01000	Protein-serine/threonine kinase	ATP binding protein kinase activity	indel	338619	347801	missing
Bcin12g03230	ANK_REP_REGION domain-containing protein	Predicted protein with ANK repeats (protein-protein interaction domains)	indel	1132802	1137075	Missing in alignment, read mapping highly variable
Bcin12g03240	ATP-grasp domain-containing protein	ATP binding and metal ion binding (also, “integral component of membrane”)	indel	1132802	1137075	Only missing in alignment, start of gene is actually missing
Bcin12g06090	Uncharacterized protein	transmembrane protein	indel	2105422	2108402	missing
Bcin13g02170	Uncharacterized protein	Involved in pathogenesis (mono-oxygenase, virulence)	indel	757939	762335	missing
Bcin13g05610	F-actin-capping protein subunit alpha	Binds to form cap on actin filaments	snp	2140071	2140075	intron variant. Also shows up in read map, but slightly displaced
Bcin14g03650	Uncharacterized protein	Unknown	indel	1391504	1406488	Only missing in alignment
Bcin14g03660	Uncharacterized protein	Unknown	indel	1391504	1406488	Only missing in alignment
EFBcT00000013199	5S_rRNA	ribosomal RNA	indel	1391504	1406488	Only missing in alignment
Bcin14g03670	Folylpolyglutamate synthase	Catalyzes conversion of folates to polyglutamate derivatives	indel	1391504	1406488	Only missing in alignment
Bcin14g03680	Uncharacterized protein	AMP-binding, otherwise unknown	indel	1391504	1406488	Only missing in alignment
Bcin14g04350	Uncharacterized protein	Unknown	duplication/snp	1705089	1712486	gene duplication (also shown as not unique in shustring), but possible stop codon at start of first exon
Bcin14g05550	Uncharacterized protein	Unknown	duplication	2108122	2119092	gene duplication, also shown in shustring as unique
Bcin15g03300	CYSTM domain-containing protein	Single-pass membrane protein, contains cysteine-rich TM module (stress tolerance, resistence to deleterious substances)	rearrangement	1156165	1163453	First part / promoter on different contig
Bcin15g04010	Uncharacterized protein	Unknown	snp	1400350	1400357	frameshift in one splice variant, but also possible exon skip (splice site lost)
Bcin15g05700	Carboxylic ester hydrolase	Hydrolase activity	indel	1996458	2027721	Near telomere…
Bcin15g05710	DUF3533 domain-containing protein	transmembrane protein	indel	1996458	2027721	Near telomere…
Bcin15g05720	Ubiquitin Carboxyl-terminal hydrolase	Ubi-conjugation pathway, de-ubiquitinase	indel	1996458	2027721	Near telomere…
Bcin16g03030	Uncharacterized protein	Unknown	indel	1167105	1170789	Missing in alignment, read mapping highly variable
Bcin16g03860	Uncharacterized protein	Unknown	indel	1422745	1423102	First ¼ missing, 3 major SNPs in remaining part
Bcin17g00090	Uncharacterized protein	transmembrane protein	duplication	111675	153004	large duplication, includes 2 genes
Bcin17g00110	J domain-containing protein	transmembrane protein	duplication	111675	153004	large duplication, includes 2 genes
Bcin17g00130	Uncharacterized protein	Unknown	indel	153005	165482	Only missing in alignment
Bcin17g00140	Uncharacterized protein	Unknown	indel	153005	165482	Only missing in alignment
Bcin17g00170	Uncharacterized protein	Unknown	rearrangement	165647	180354	first half on other contig
Bcin18g00010	Uncharacterized protein	homologous to putative heterokaryon compatibility protein	Chromosome missing			Entire chromosome appears missing
Bcin18g00020	Oxidored_FMN domain-containing protein	FMN (flavin mono nucleotide) binding, oxidoreductase activity	Chromosome missing			Entire chromosome appears missing
Bcin18g00040	Uncharacterized protein	Unknown	Chromosome missing			Entire chromosome appears missing
Bcin18g00060	ULP_PROTEASE domain-containing protein	Cysteine-type peptidase activity	Chromosome missing			Entire chromosome appears missing
Bcin18g00110	Uncharacterized protein	Contains coiled coil	Chromosome missing			Entire chromosome appears missing
Bcin18g00120	Uncharacterized protein	Contains coiled coil	Chromosome missing			Entire chromosome appears missing
Bcin18g00130	Uncharacterized protein	Unknown	Chromosome missing			Entire chromosome appears missing
Bcin18g00135	Uncharacterized protein	transmembrane protein	Chromosome missing			Entire chromosome appears missing
Bcin18g00140	Uncharacterized protein	Unknown	Chromosome missing			Entire chromosome appears missing
Bcin18g00145	Uncharacterized protein	Unknown	Chromosome missing			Entire chromosome appears missing
Bcin18g00150	Uncharacterized protein	transmembrane protein	Chromosome missing			Entire chromosome appears missing
Bcin18g00160	Uncharacterized protein	transmembrane protein	Chromosome missing			Entire chromosome appears missing
Bcin18g00170	Uncharacterized protein	Unknown	Chromosome missing			Entire chromosome appears missing
Bcin18g00180	Uncharacterized protein	Unknown	Chromosome missing			Entire chromosome appears missing
Bcin18g00190	Uncharacterized protein	Unknown	Chromosome missing			Entire chromosome appears missing
